# Supplementary material
Source: ML conference proceedings conference paper supplement (https://aclanthology.org/2022.aacl-demo.2)
Supplement: Software [file 9508.doc]

Add relayd entry to reverse proxy example configurations.
