# Supplementary material
Source: ML conference proceedings conference paper supplement (https://aclanthology.org/2022.aacl-demo.2)
Supplement: Software [file 9550.doc]

Improve the SAML2 upgrade notes for 1.27.0.
