# Supplementary material
Source: ML conference proceedings conference paper supplement (https://aclanthology.org/2022.aacl-demo.2)
Supplement: Software [file 9571.doc]

Link to the "List user's media" admin API from the media admin API docs.
